# Supplementary material for: Large second harmonic generation in a penta-CdO2sheet exfoliated from its bulk phase
Source: Royal Society of Chemistry journal article supplement (doi:10.1039/d2ta07589j), 2022-11-25
Supplement: d2ta07589j1.pdf [file d2ta07589j1.pdf]

Electronic Supplementary Information

**Large second harmonic generation in penta-CdO<sub>2</sub> sheet exfoliated  
from its bulk phase**

Changsheng Hou,<sup>a</sup> Yiheng Shen,<sup>a</sup> Qian Wang<sup>\*a</sup>, Y. Kawazoe,<sup>b,c,d</sup> and P. Jena<sup>e</sup>

<sup>a</sup> CAPT, School of Materials Science and Engineering, BKL-MEMD, Peking University, Beijing, 100871, China.

<sup>b</sup> New Industry Creation Hatchery Center, Tohoku University, Sendai, 980-8577, Japan;

<sup>c</sup> Department of Physics, Suranaree University of Technology, Nakhon Ratchasima, 30000, Thailand;

<sup>d</sup> Department of Physics and Nanotechnology, SRM Institute of Science and Technology, Kattankulathur, Tamil Nadu, 603203, India.

<sup>e</sup> Department of Physics, Virginia Commonwealth University, Richmond, VA, 23284, USA.

\* Author to whom any correspondence should be addressed: qianwang2@pku.edu.cn

**Table S1** The forty-five *d*<sup>10</sup>-TM oxides from the Materials Project (MP) Database. SG represents the space group.

| Formula                        | MP-id                              | SG                                 | Formula                        | MP-id   | SG                                 | Formula          | MP-id   | SG                                 |
|--------------------------------|------------------------------------|------------------------------------|--------------------------------|---------|------------------------------------|------------------|---------|------------------------------------|
| PdO <sub>2</sub>               | <i>P4<sub>2</sub>/mnm</i>          | 1018886                            | CuO <sub>2</sub>               | 614565  | <i>Fmmm</i>                        | ZnO              | 2133    | <i>P6<sub>3</sub>mc</i>            |
| PdO                            | <i>P4<sub>2</sub>/mmc</i>          | 1336                               | CuO <sub>2</sub>               | 600604  | <i>Fmmm</i>                        | ZnO              | 1986    | <i>F<sup>-4</sup><sub>3</sub>m</i> |
| PdO <sub>2</sub>               | <i>Pn<sup>-3</sup><sub>m</sub></i> | 10729                              | CuO <sub>2</sub>               | 705439  | <i>Pmmm</i>                        | ZnO <sub>2</sub> | 8484    | <i>Pa<sup>-3</sup></i>             |
| PdO                            | <i>Fm<sup>-3</sup><sub>m</sub></i> | 10728                              | Ag <sub>2</sub> O              | 353     | <i>Pn<sup>-3</sup><sub>m</sub></i> | ZnO              | 2229    | <i>Fm<sup>-3</sup><sub>m</sub></i> |
| PdO                            | <i>Pm<sup>-3</sup><sub>m</sub></i> | 603251                             | Ag <sub>3</sub> O <sub>4</sub> | 1605    | <i>P2<sub>1</sub>/c</i>            | ZnO <sub>2</sub> | 1094003 | <i>P<sup>-3</sup><sub>m</sub>1</i> |
| CuO                            | 1692                               | <i>P4<sub>2</sub>/mmc</i>          | AgO                            | 499     | <i>Cccm</i>                        | CdO              | 1132    | <i>Fm<sup>-3</sup><sub>m</sub></i> |
| Cu <sub>2</sub> O              | 361                                | <i>Pn<sup>-3</sup><sub>m</sub></i> | AgO                            | 1065190 | <i>C2/c</i>                        | CdO <sub>2</sub> | 2310    | <i>Pa<sup>-3</sup></i>             |
| CuO                            | 704645                             | <i>C2/c</i>                        | AgO                            | 1066856 | <i>C2/c</i>                        | CdO <sub>2</sub> | 1096866 | <i>P<sup>-3</sup><sub>m</sub>1</i> |
| CuO                            | 1064456                            | <i>Cccm</i>                        | Ag <sub>2</sub> O <sub>3</sub> | 546190  | <i>Fdd2</i>                        | CdO <sub>2</sub> | 1096876 | <i>Cm</i>                          |
| Cu <sub>4</sub> O <sub>3</sub> | 1478                               | <i>I4<sub>1</sub>/amd</i>          | AgO                            | 1079720 | <i>P2<sub>1</sub>/c</i>            | HgO              | 1224    | <i>Pnma</i>                        |
| Cu <sub>8</sub> O              | 31217                              | <i>Cmmm</i>                        | AgO                            | 1288    | <i>I4<sub>1</sub>/a</i>            | HgO              | 556859  | <i>P2<sub>1</sub>/m</i>            |

|                   |         |              |                                |       |              |                   |         |          |
|-------------------|---------|--------------|--------------------------------|-------|--------------|-------------------|---------|----------|
| CuO               | 14549   | $Fm\bar{3}m$ | Ag <sub>2</sub> O              | 7711  | $P\bar{3}m1$ | HgO               | 7826    | $P3_121$ |
| Cu <sub>8</sub> O | 704745  | $Amm2$       | Ag <sub>2</sub> O <sub>3</sub> | 11872 | $Pn\bar{3}m$ | HgO               | 1077107 | $P3_221$ |
| CuO <sub>2</sub>  | 1181499 | $Cmcm$       | AgO                            | 8222  | $F\bar{4}3m$ | HgO <sub>2</sub>  | 557266  | $Pbca$   |
| CuO <sub>2</sub>  | 601195  | $Cmcm$       | Au <sub>2</sub> O <sub>3</sub> | 27253 | $Fdd2$       | Hg <sub>2</sub> O | 2278    | $C2/m$   |

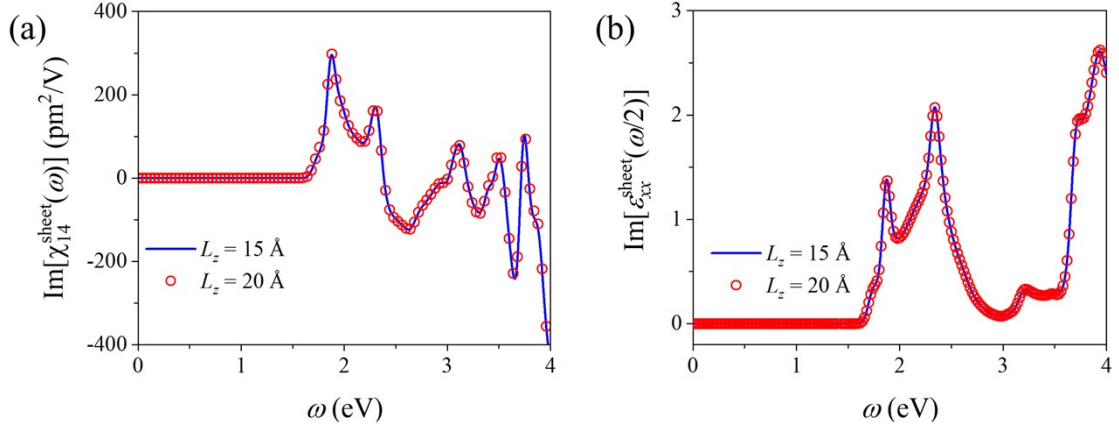

**Fig. S1** Imaginary part of (a) the SHG susceptibility, and (b) the dielectric function of penta-CdO<sub>2</sub> obtained with different vacuum space  $L_z$ .

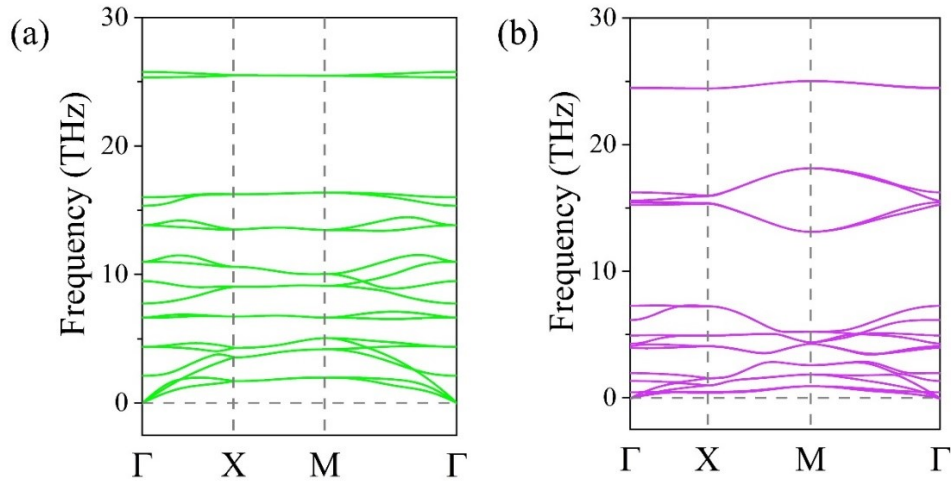

**Fig. S2** Phonon spectra of (a) penta-ZnO<sub>2</sub> and (b) penta-HgO<sub>2</sub>.

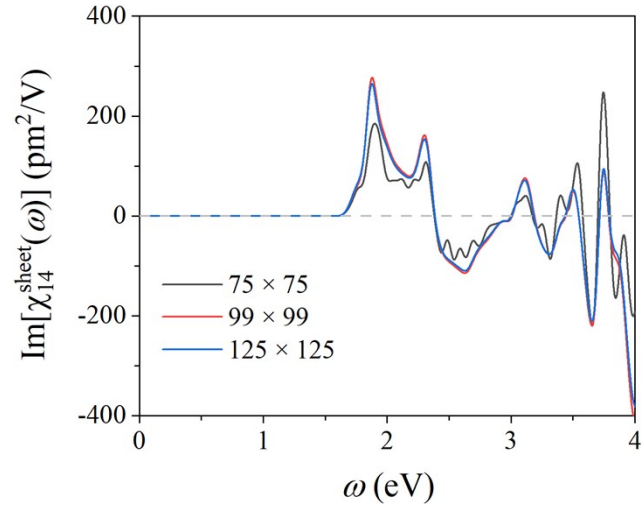

**Fig. S3** Imaginary part  $\text{Im}[\chi_{\text{sheet } 14}(\omega)]$  of the SHG susceptibility of penta- $\text{CdO}_2$  obtained with different  $k$ -mesh.

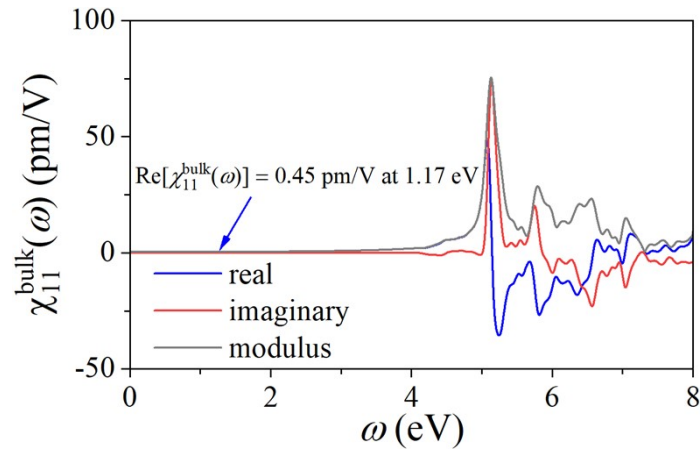

**Fig. S4** SHG susceptibility  $\chi_{\text{bulk } 11}(\omega)$  of KBBF.

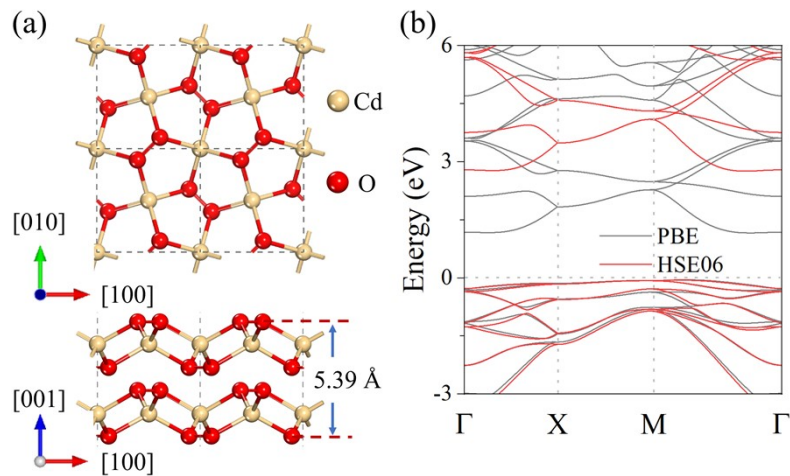

**Fig. S5** (a) Top and side views of the optimized geometry, and (b) electronic band structure of bilayer penta-CdO<sub>2</sub>.

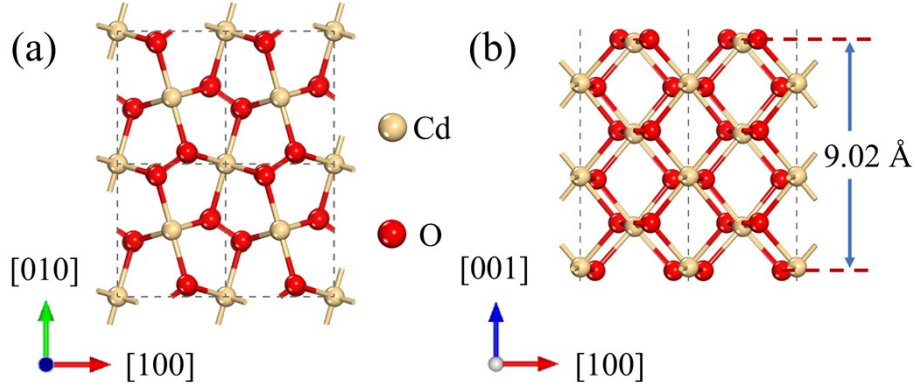

**Fig. S6** (a) Top and (b) side views of the optimized geometry of trilayer penta-CdO<sub>2</sub>.

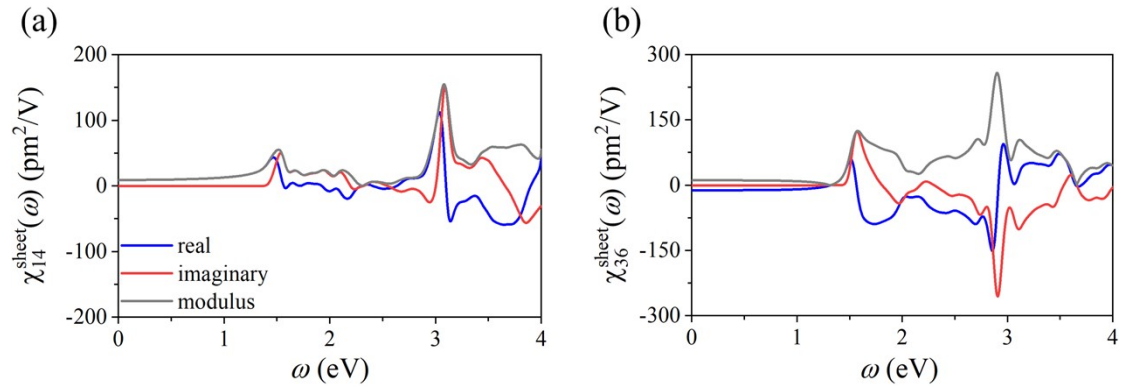

**Fig. S7** SHG susceptibility of (a)  $\chi_{14}^{\text{sheet}}(\omega)$  and (b)  $\chi_{36}^{\text{sheet}}(\omega)$  of bilayer penta-CdO<sub>2</sub>.

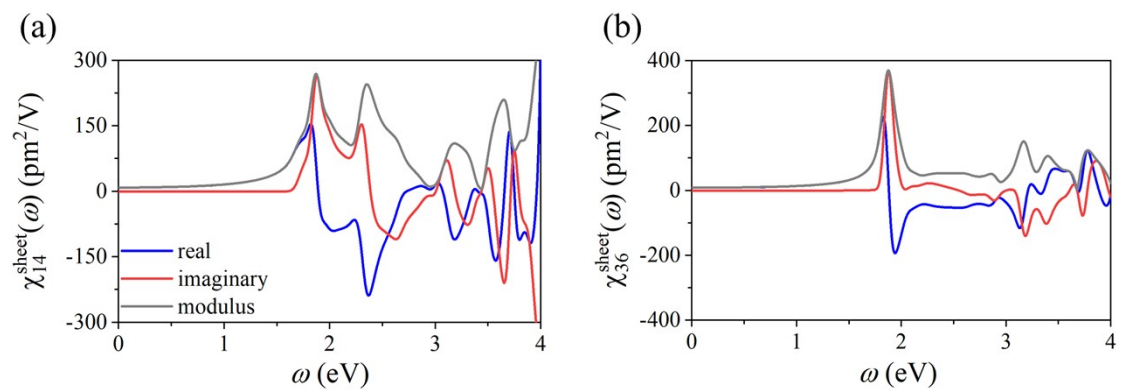

**Fig. S8** SHG susceptibility (a)  $\chi_{\text{sheet } 14}(\omega)$  and (b)  $\chi_{\text{sheet } 36}(\omega)$  of penta-CdO<sub>2</sub>.

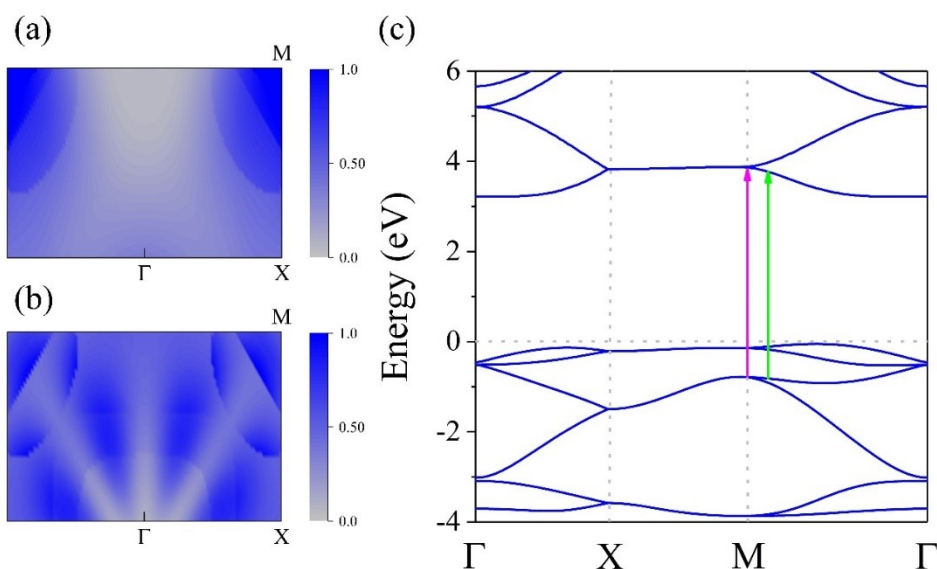

**Fig. S9** Normalized  $k$ -point-dependent distributions of (a)  $\text{Im}[\epsilon_{\text{sheet } xx}(\omega/2)]$  and (b)  $\text{Im}[\epsilon_{\text{sheet } zz}(\omega/2)]$  at the peak value at  $\omega/2 = 1.88$  eV, and (c) band structure of penta-CdO<sub>2</sub> at the PBE level with scissors correction.

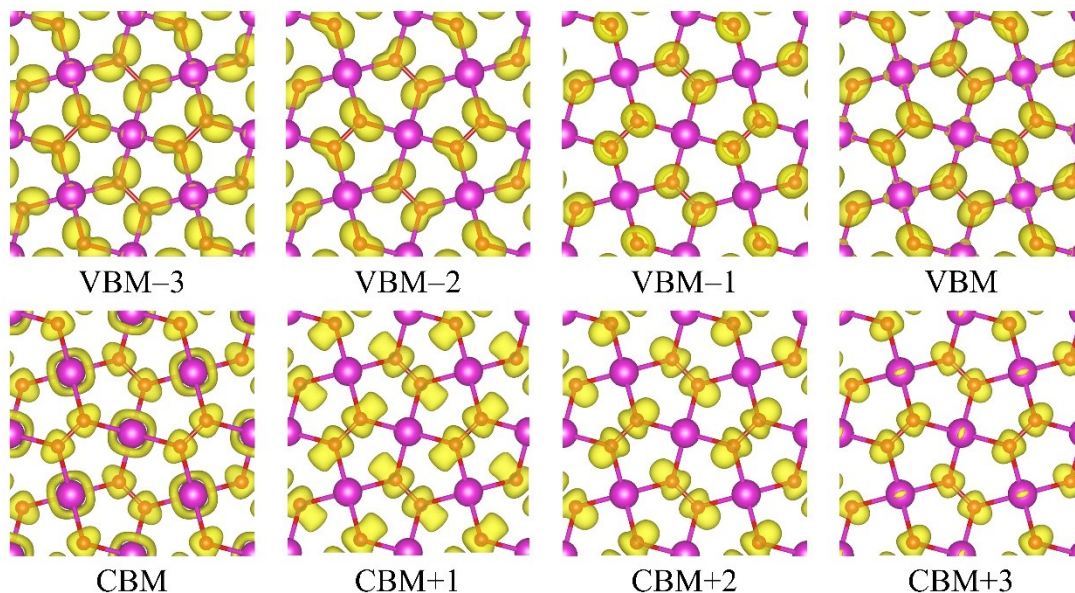

**Fig. S10** Band-decomposed charge density distribution of the energy bands near the Fermi level of penta-CdO<sub>2</sub> (isosurface values =  $0.005 \text{ \AA}^{-3}$ ).

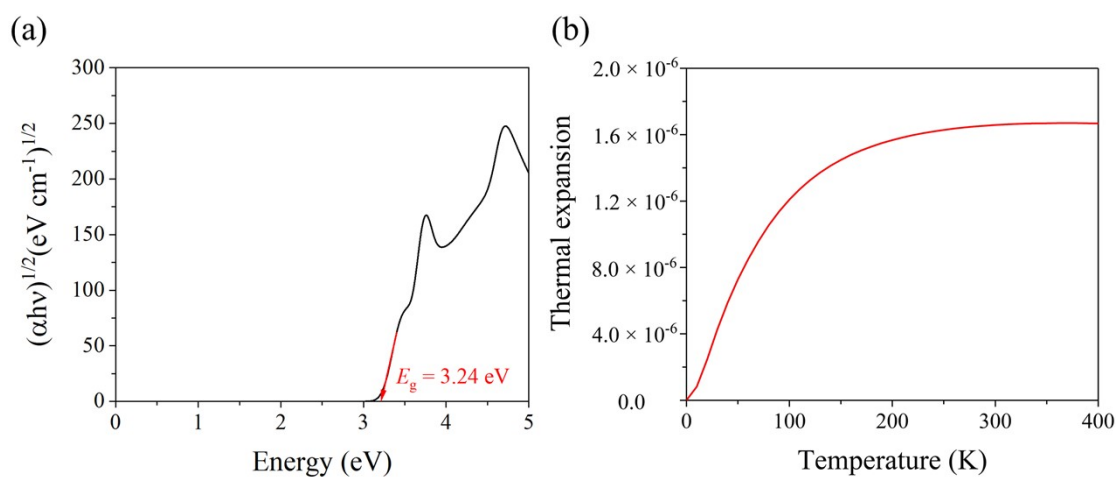

**Fig. S11** (a) Optical band gap ( $E_g$ ) determined from the Tauc plot, and (b) thermal expansion of penta- $\text{CdO}_2$ .

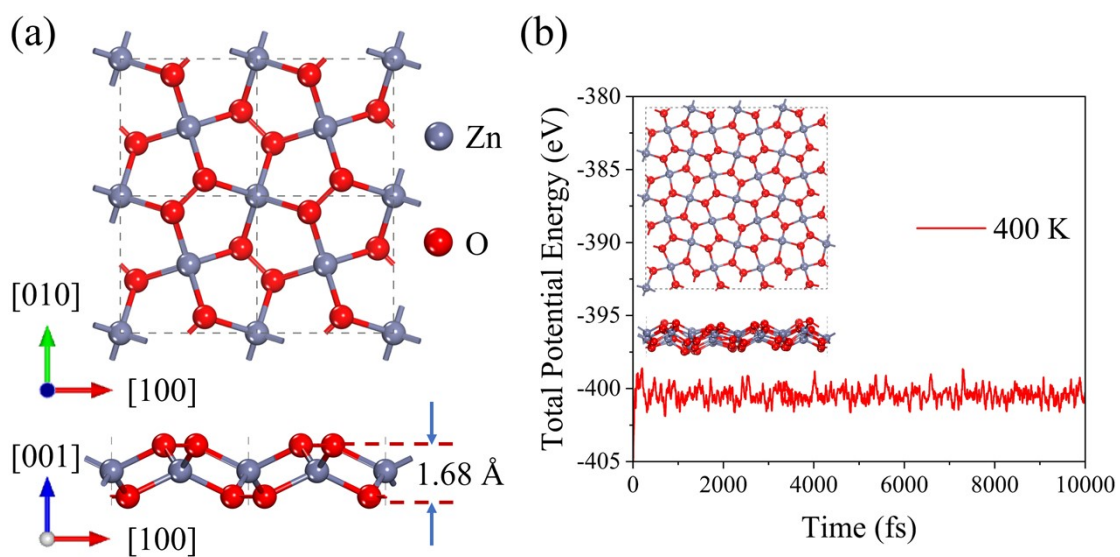

**Fig. S12** (a) Top and side views of the optimized geometry of penta- $\text{ZnO}_2$ . (b) Total potential energy fluctuation with time during the AIMD simulation at 400 K.

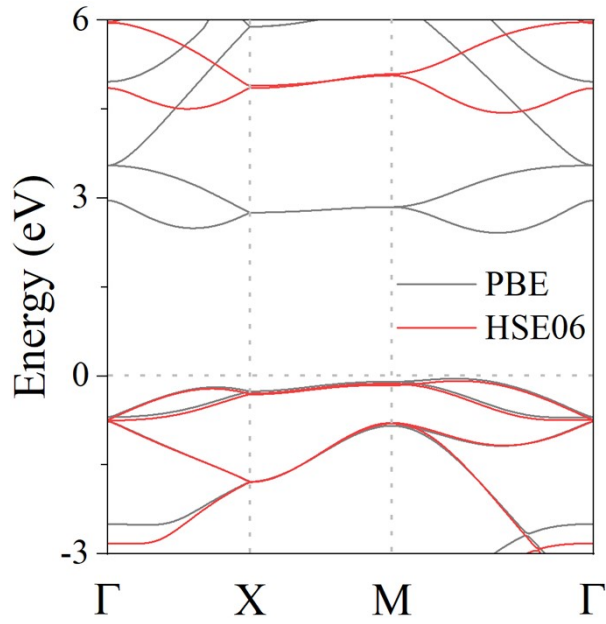

**Fig. S13** Electronic band structure of penta-ZnO<sub>2</sub>.

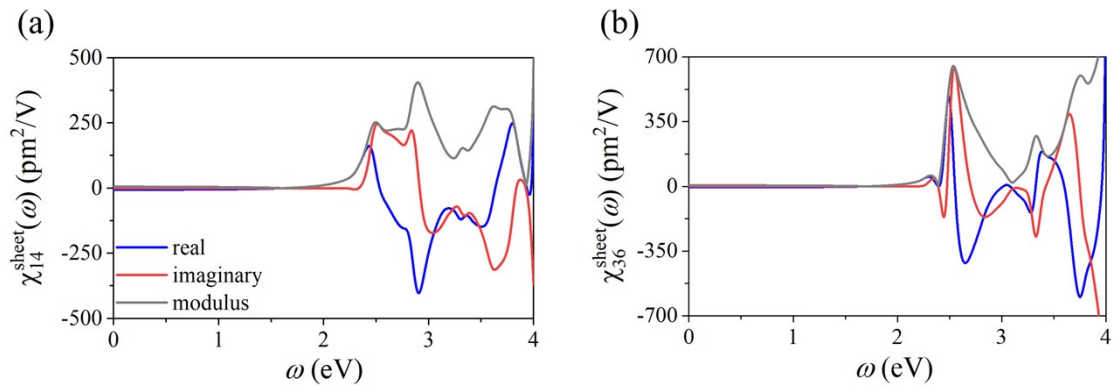

**Fig. S14** SHG susceptibilities (a)  $\chi_{14}^{\text{sheet}}(\omega)$  and (b)  $\chi_{36}^{\text{sheet}}(\omega)$  of penta-ZnO<sub>2</sub>.

We also find that another 2D  $d^{10}$ -TM oxide, penta-ZnO<sub>2</sub>, can also exhibit large SHG response, as we expected. The fully optimized geometry of penta-ZnO<sub>2</sub> is presented in Fig. S12(a). Its unit cell contains two Zn and four O atoms, which occupy two nonequivalent Wyckoff positions, namely, 2b (0.500, 0.500, 0.500) and 4e (0.882, 0.618, 0.458), respectively. The lattice parameters are  $a = b = 4.49$  Å. The penta-ZnO<sub>2</sub> sheet is also dynamically and thermally stable, as illustrated in Fig. S1(a) and Fig.

S12(b). The calculated linear elastic constants are  $C_{11} = 42.50 \text{ N m}^{-1}$ ,  $C_{12} = 3.00 \text{ N m}^{-1}$ , and  $C_{66} = 22.56 \text{ N m}^{-1}$ , which meet the requirements of Born-Huang criteria ( $C_{11} > 0$ ,  $C_{11} > C_{12}$  and  $C_{66} > 0$ ),<sup>50</sup> confirming that penta-ZnO<sub>2</sub> is mechanically stable. The band structures of penta-ZnO<sub>2</sub> at the HSE06 level and PBE level are given in Fig. S13, which show that penta-ZnO<sub>2</sub> is also semiconducting with an indirect band gap of 2.46 eV at the PBE level, and 4.52 eV at the HSE06 level, larger than the corresponding values of 1.45 and 3.28 eV, respectively, for penta-CdO<sub>2</sub>. We further explore its potential for SHG performance because of the non-centrosymmetric and non-metallic features of penta-ZnO<sub>2</sub>. We find that penta-ZnO<sub>2</sub> possesses strong in-plane and out-of-plane SHG response with large static SHG susceptibilities of  $\chi_{\text{sheet } 14}(0) = \chi_{\text{sheet } 25}(0) = \chi_{\text{sheet } 36}(0) = -5.60 \text{ pm}^2/\text{V}$ . We further calculate the frequency-dependent SHG susceptibility of penta-ZnO<sub>2</sub>, especially consider its imaginary part ( $\text{Im}[\chi_{\text{sheet } abc}(\omega)]$ ). The real parts, imaginary parts, and modulus of different nonzero independent SHG tensor components are plotted in Fig. S14. One can see that the  $\text{Im}[\chi_{\text{sheet } 14}(\omega)]$  and  $\text{Im}[\chi_{\text{sheet } 36}(\omega)]$  of penta-ZnO<sub>2</sub> have the most significant peak values of 236.85 pm<sup>2</sup>/V and 639.56 pm<sup>2</sup>/V at 2.54 eV, respectively. The most significant peak value of  $\text{Im}[\chi_{\text{sheet } abc}(\omega)]$  in penta-CdO<sub>2</sub> is at a lower energy range due to its smaller band gap of 3.28 eV at the HSE06 level compared with that of penta-ZnO<sub>2</sub>, leading to a larger SHG response in penta-CdO<sub>2</sub>.
